# Supplementary material
Source: PubMed Central journal article supplement (PMC8639668)
Supplement: NIHMS1742622-supplement-1.pdf [file NIHMS1742622-supplement-1.pdf]

# SUPPLEMENTAL FIGURES

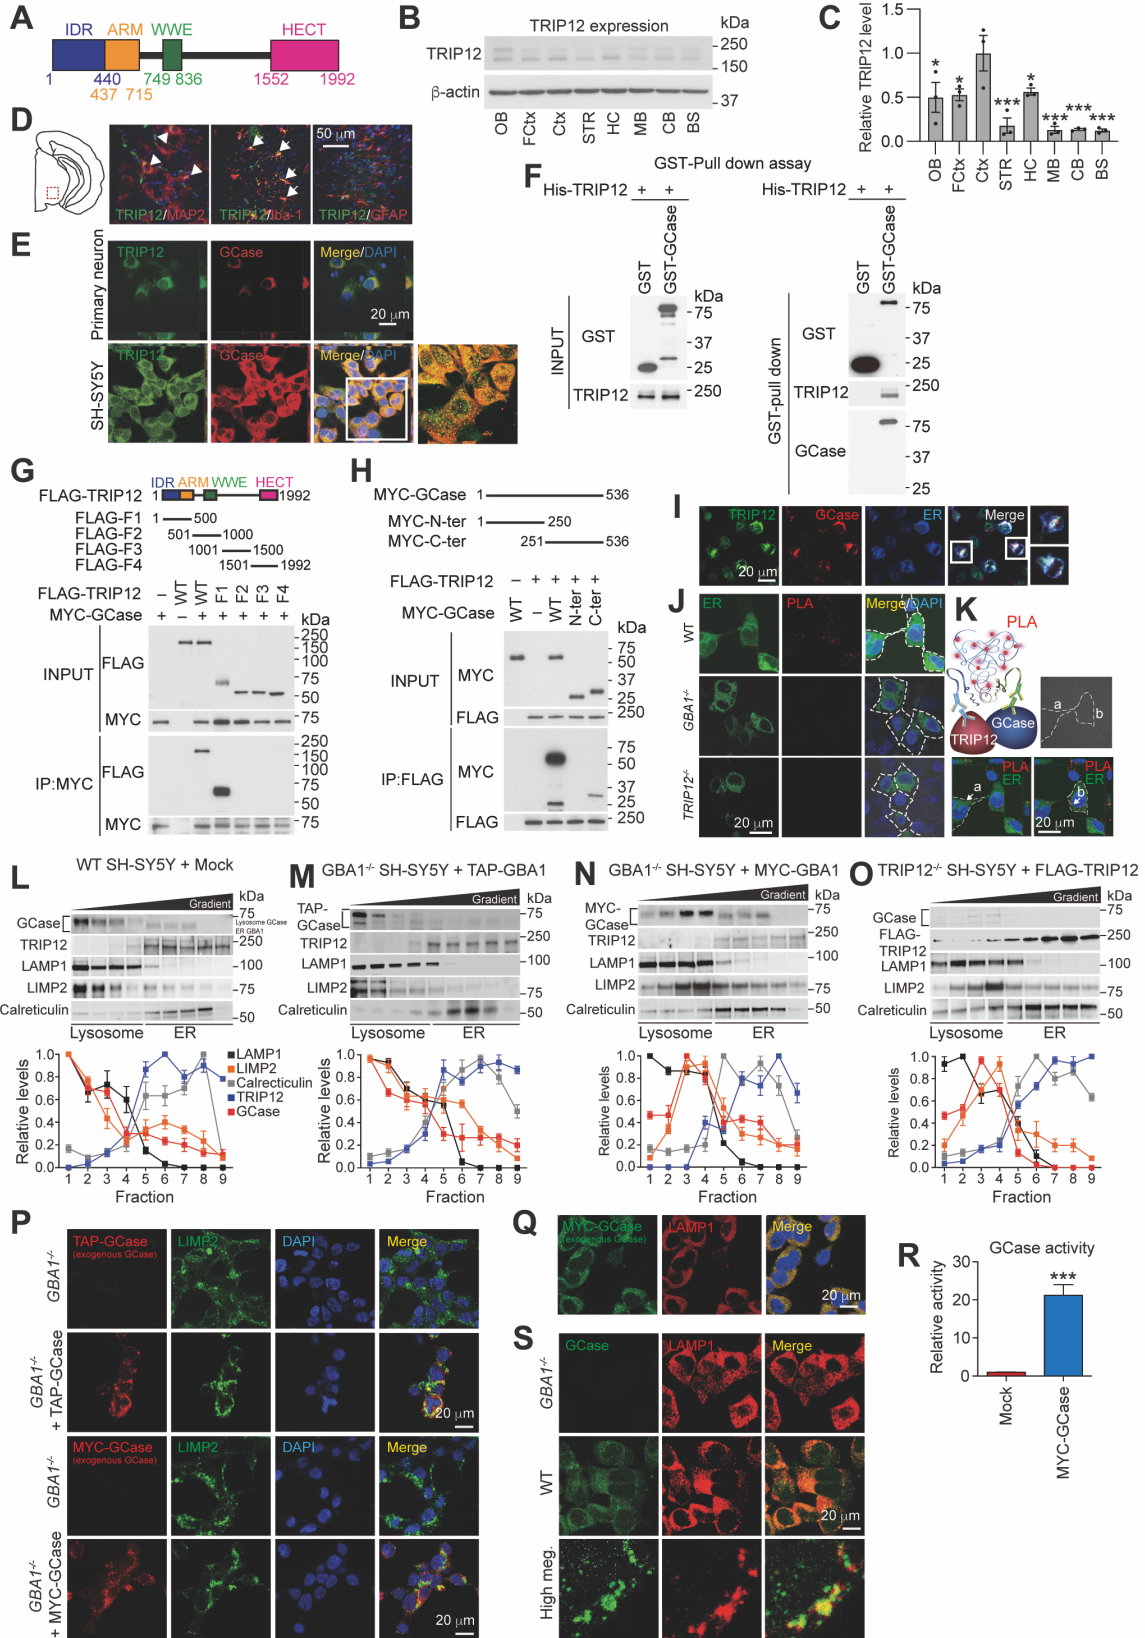

**Figure S1. Identification of TRIP12 and binding domain between TRIP12 and GCCase and validation for tagged constructs of TRIP12 and GCCase (Related to Figure 1).**

(A) Schematic diagram of the TRIP12 protein showing the IDR, ARM, WWE and HECT domain motifs.

(B) Regional analysis and levels of TRIP12 expression by western blot analysis.

(C) Levels of TRIP12 expression in each region were quantified as a bar graph (n=3, each group).

(D) Representative confocal images with anti-TRIP12 antibody along with various cell-type specific markers. The co-localization of TRIP12 (green) with neuronal (MAP2), microglial (Iba-1), or astroglial (GFAP) markers (red) was measured in the SNpc of wild-type mice.

(E) Representative confocal images with anti-TRIP12 and anti- GCCase antibodies reveal that TRIP12 and GCCase are co-localized mostly in primary cultured neurons or SH-SY5Y dopaminergic-like neurons.

(F) GST-pull-down assay between His-tagged TRIP12 and GST-tagged GCCase, indicating an interaction between GCCase and TRIP12.

(G) A full-length FLAG- tagging TRIP12 (FLAG-TRIP12) and N-terminal fragment of TRIP12 (FLAG-F1) interacts with GCCase. Deletion mutants of FLAG-TRIP12 include the N-terminal fragment (F1), the intermediate domains (F2 and F3), or the C-terminal domain (F4) of TRIP12.

(H) A full-length MYC-tagging GCCase (MYC-GCCase) and C-terminal fragment of GCCase (MYC-C-ter) interacts with TRIP12. Deletion mutants of MYC-GCCase include N-terminal fragment of GCCase (MYC-N-ter) or MYC-C-ter.

(I) Representative confocal image showing co-localization between TRIP12 and GCCase in the ER. The SH-SY5Y cells were stained with anti-TRIP12, GCCase, and Calreticulin antibodies for ER marker.

(J) The positive fluorescence signals in WT SH-SY5Y cells were eliminated in *GBA1* knockout (*GBA1*<sup>-/-</sup>) or *TRIP12* knockout (*TRIP12*<sup>-/-</sup>) SH-SY5Y cells.

(K) Confocal z-stack images from the proximity ligation assay (PLA) shows that interaction between TRIP12 and GCCase (a and b) occurs in the endoplasmic reticulum (ER) of WT SH-SY5Y cells.

(L) The intracellular localization of endogenous TRIP12 and GCCase in SH-SY5Y with Mock through density gradient-based subcellular fractionation.

(M and N) Validation for tagged constructs of GCCase. The intracellular localization of TAP-tagging (TAP-GCCase) or MYC-tagging GCCase (MYC-GCCase) overexpressed *GBA1* knockout SH-SY5Y cells. TAP-GCCase or MYC-GCCase plasmids were transfected in *GBA1* knockout SH-SY5Y followed by iodixanol density gradient centrifugation.

(O) FLAG-TRIP12 plasmid was transfected in *TRIP12* knockout SH-SY5Y followed by gradient centrifugation (related to Supporting Figure 3).

(L-O) Isolated subcellular fractions (1 to 9) were subjected to western blot analysis using anti-GCCase, TRIP12, MYC, FLAG, LAMP1, LIMP2, and Calreticulin antibodies. The proteins were quantified by the densitometric analysis of bands in digital images of western blots. For each given protein, the average density of each fraction was normalized to the high peak density of the protein and plotted as a line graph. (n=3, each fraction).

(P) The colocalization of TAP- or MYC-tagged GCCase with LIMP2. TAP- or MYC-GCCase were transfected in *GBA1* knockout SH-SY5Y cells for 48 hours. Representative confocal images with anti-GCCase or MYC antibodies along with anti-LIMP2 antibody reveal that exogenous TAP- or MYC-GCCase are co-localized with LIMP2 in *GBA1* knockout SH-SY5Y cells.

(Q) Representative confocal images with anti-MYC and anti-LAMP1 antibodies reveal that exogenous MYC-GCCase are co-localized in the lysosomes of SH-SY5Y cells.

(R) Lysosomes were isolated from Mock and MYC-tagged GCCase transfected SH-SY5Y cells. The GCCase activity was measured using 4-Methylumbelliferyl  $\beta$ -glucopyranoside (n=5, each group).

(S) Confirmation of GCCase antibody's quality and integrity. Data are presented as the mean  $\pm$  SEM (\* $P$  < 0.05, \*\* $P$  < 0.01, \*\*\* $P$  < 0.001).

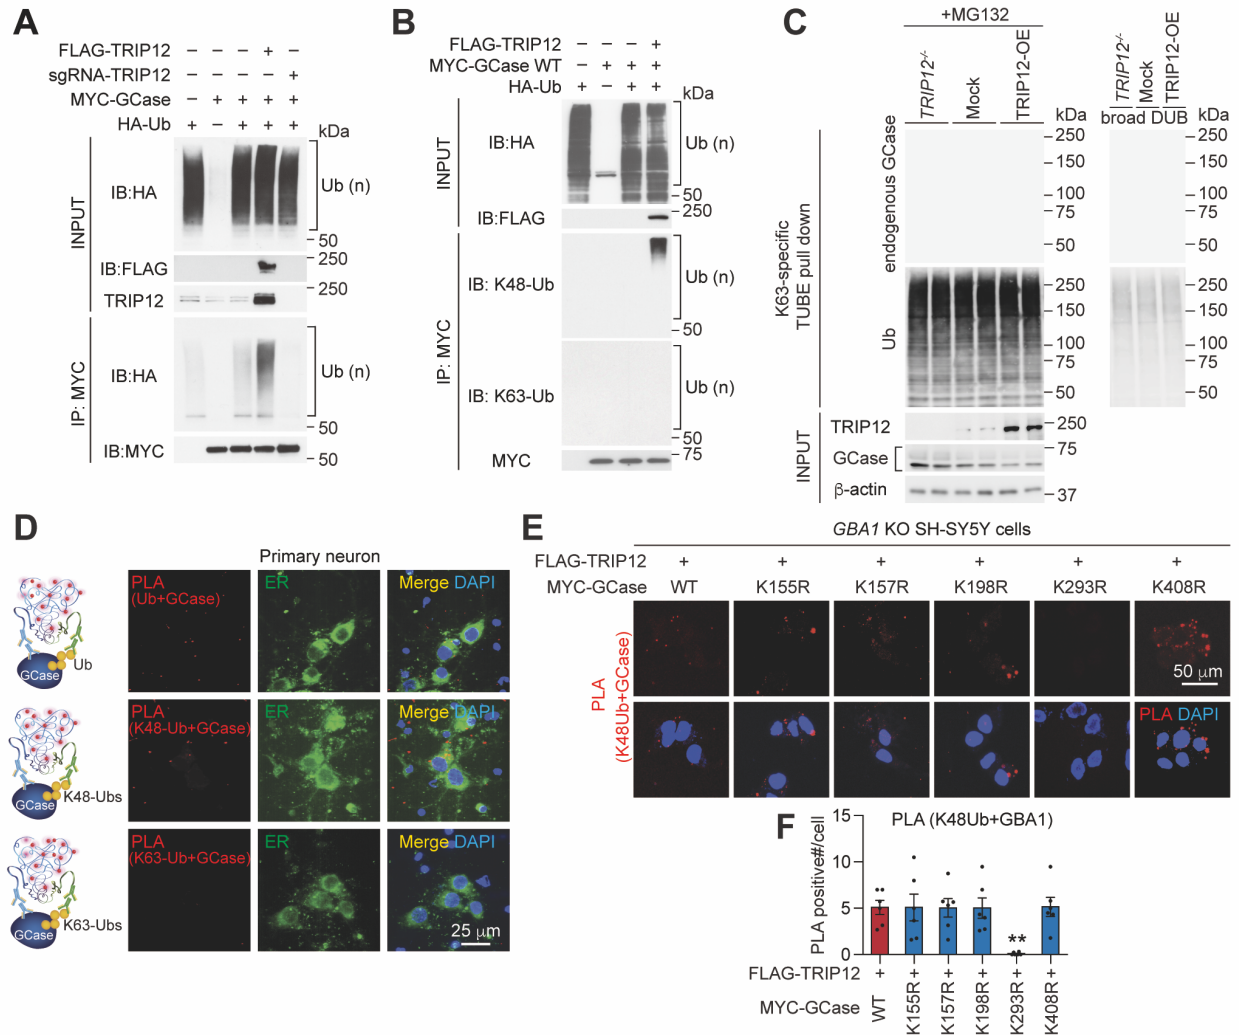

**Figure S2. TRIP12 ubiquitinates K293 residue of GCase through K48-specific ubiquitin linkage (Related to Figure 1).**

(A) Endogenous TRIP12-induced ubiquitination of MYC-GCase (lane 3 of IP: MYC) was enhanced by FLAG-TRIP12 overexpression but was eliminated in *TRIP12* knockout SH-SY5Y cells (lane 5 of IP: MYC).

(B) In vivo ubiquitination assay, K48-specific ubiquitination of MYC-GCase by FLAG-TRIP12 were confirmed by immunoreactivity with a K48-specific anti-ubiquitin antibody. No immunoreactivity was observed with a K63-specific anti-ubiquitin antibody.

(C) TRIP12 ubiquitinates endogenous GCase through K48-specific ubiquitin linkage. Representative western blots show Ub-MYC-GCase was not detected in fractions enriched by K63-specific TUBE pulldown in SH-SY5Y cells with Mock, TRIP12 overexpression (TRIP12-OE), and *TRIP12* knockout (*TRIP12*<sup>-/-</sup>) in presence of MG132 (left panel). K63-specific ubiquitin enrich fractions were incubated with a DUB (right panel). The isolated ubiquitinated proteins and input material were analyzed anti-GCase, TRIP12, ubiquitin, and β-actin antibodies.

(D) A proximity ligation assays showed that endogenous GCCase specifically bound to endogenous K48-specific ubiquitin without any interaction with K63-specific ubiquitin in the ER of primary cultured neurons. The ER was stained with the ER tracker Green. (E) The candidate lysine (K) residues were changed to arginine (R) by site-directed mutagenesis and K48-specific ubiquitination of MYC-GCase WT, MYC-GCase K155R, MYC-GCase K157R, MYC-GCase K198R, MYC-GCase K293R, and MYC-GCase K408R expressed in *GBA1* knockout SH-SY5Y cells were determined by *in situ* PLA assay. (F) The fluorescence signals were quantified as bar graph. Data are represented as mean  $\pm$  SEM (NS; not significant,  $**P < 0.01$ ).

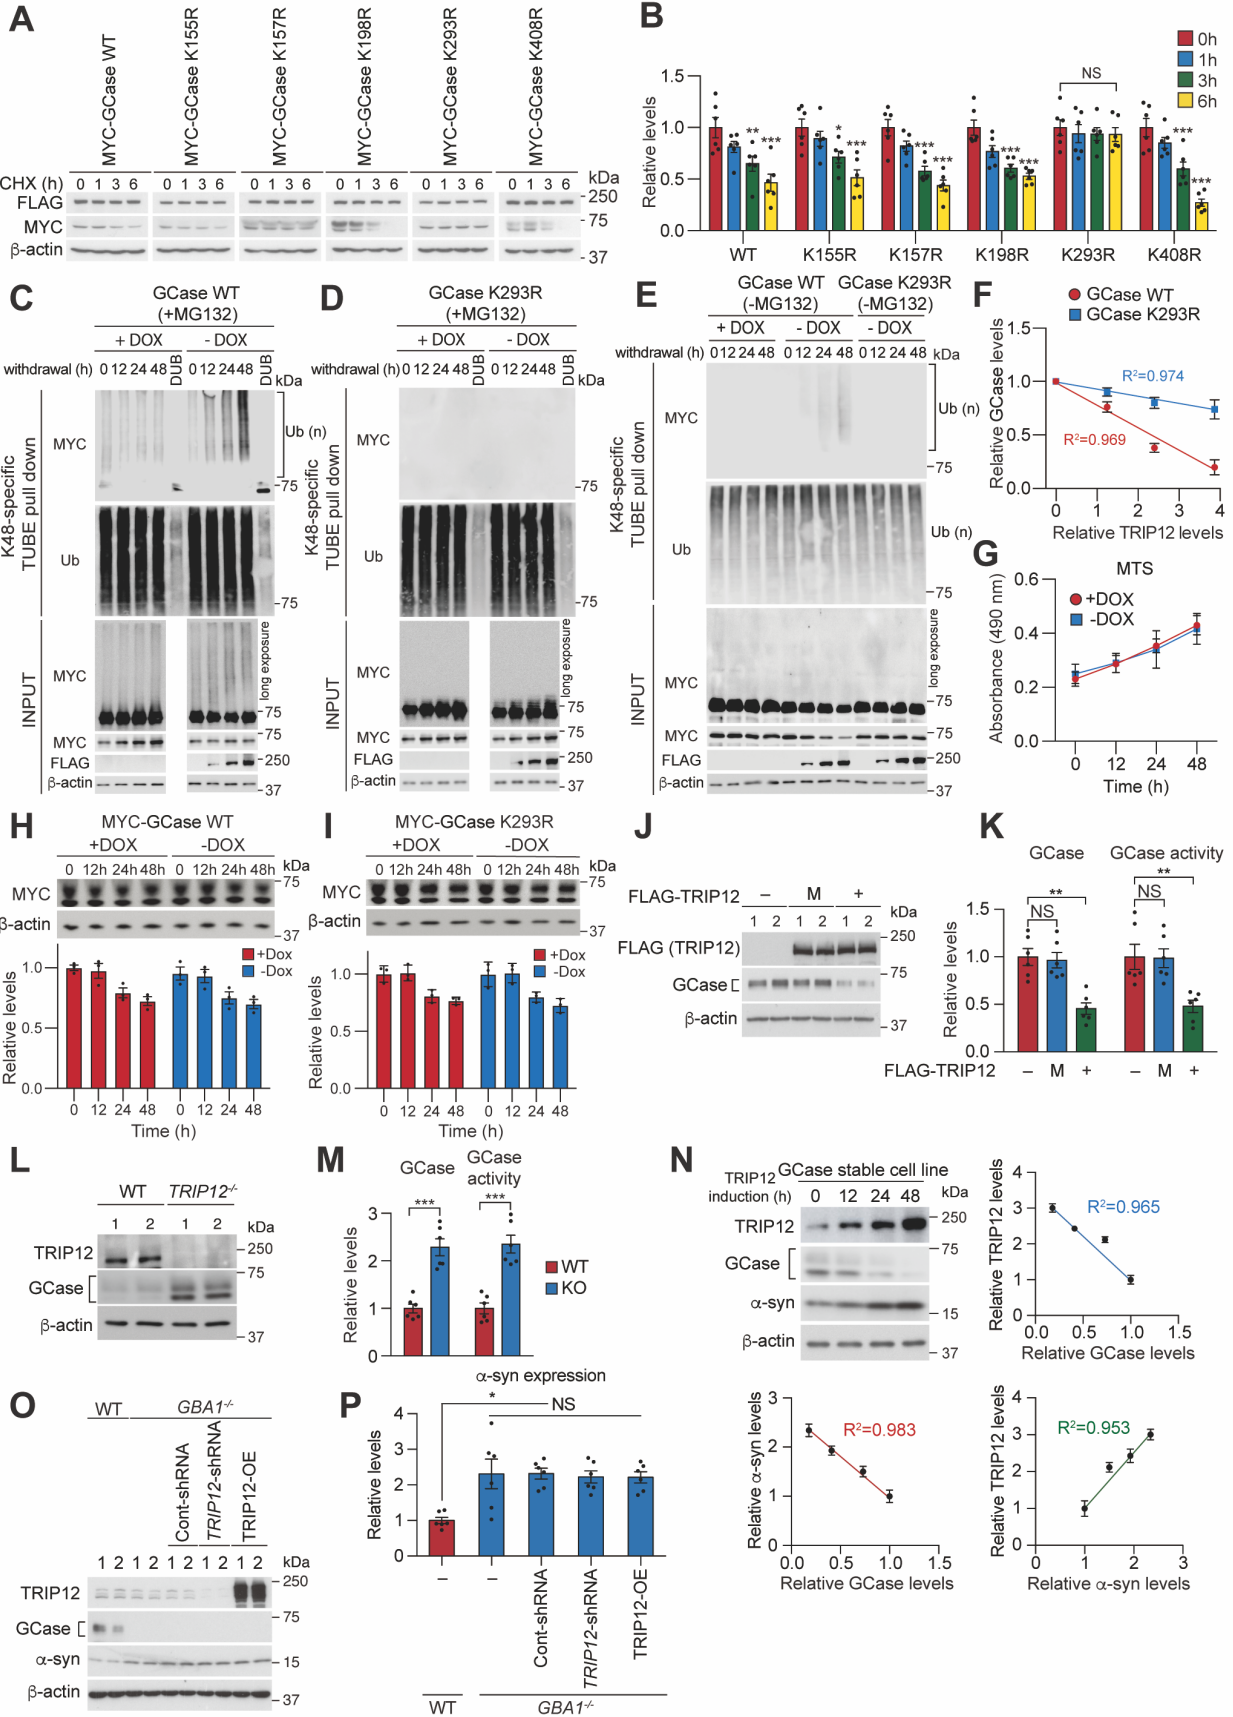

**Figure S3. TRIP12 site specific ubiquitination of GCase causes its ubiquitin-mediated proteasome degradation, leading to alterations in  $\alpha$ -synuclein levels (Related to Figure 1).**

(A) MYC-GCase WT, MYC-GCase K155R, MYC-GCase K157R, MYC-GCase K198R, MYC-GCase K293R, and MYC-GCase K408R expression levels were assessed with TRIP12 overexpression in cycloheximide-treated SH-SY5Y cells.

(B) Quantification of MYC-GCase levels (n=6, each group). (C and D) Tet off-inducible FLAG-TRIP12 system in SH-SY5Y cells transfected with

(C) MYC-GCase WT or (D) MYC-GCase K293R in presence of MG132. After the withdrawal of doxycycline, Ub-MYC-GCase was enriched by K48-specific TUBE pulldown. Levels of Ub-MYC-GCase were assessed by western blot at indicated time points (0, 12, 24 h, and 48h). K48-specific ubiquitin enriched fractions at 48h incubated with a DUB. The isolated ubiquitinated proteins and input material were analyzed using anti-MYC, FLAG, ubiquitin, and  $\beta$ -actin antibodies.

(E) Tet off-inducible FLAG-TRIP12 SH-SY5Y cells transfected with MYC-GCase WT or MYC-GCase K293R in absence of MG132. Ub-MYC-GCase in K48-specific ubiquitin enriched fractions and MYC-GCase levels in input materials was evaluated.

(F) Inverse correlation between GCase WT and TRIP12 levels or between GCase K293R and TRIP12 levels.

(G) Cell proliferation in presence or absence of Dox in the Tet off-inducible FLAG-TRIP12 SH-SY5Y cells. The cell proliferation rate was measured at the indicated time points (0, 12 h, 24 h, and 48 h) through MTS assay. Doxycycline (DOX) did not affect cell proliferation in the Tet off-inducible FLAG-TRIP12 SH-SY5Y.

(H and I) Signal decay of transiently expressed GCase according to the presence or absence of DOX in WT SH-SY5Y cells. Western blots and bar graphs showing the signal decay of (H) MYC-GCase WT or (I) MYC-GCase K293R expressed in WT SH-SY5Y over time (0, 12 h, 24 h, and 48 h). GCase constructs showed decreased protein expression by approximately 25%, 48h after transfection regardless of the DOX treatment.

(J and K) GCase expression and GCase activity levels were monitored in FLAG-TRIP12 WT, TRIP12 catalytic site mutant (M) overexpression.

(L and M) GCase expression and GCase activity levels were measured in TRIP12 knockout SH-SY5Y cells (n=6, each group).

(N) TRIP12 was transfected into SH-SY5Y cells stably expressing GCase. The correlation of TRIP12, GCase, and  $\alpha$ -synuclein expression levels was determined (n=4, each group). (O) The  $\alpha$ -syn expression levels of WT SH-SY5Y cells were compared to those of *GBA1* knockout SH-SY5Y cells with *TRIP12* knockdown (TRIP12-shRNA) or overexpression (TRIP12-OE).

(P) The  $\alpha$ -syn expression levels were measured and presented as a bar graph. Data are presented as mean  $\pm$  SEM (NS; not significant, \* $P < 0.05$ , \*\* $P < 0.01$ , \*\*\* $P < 0.001$ ).

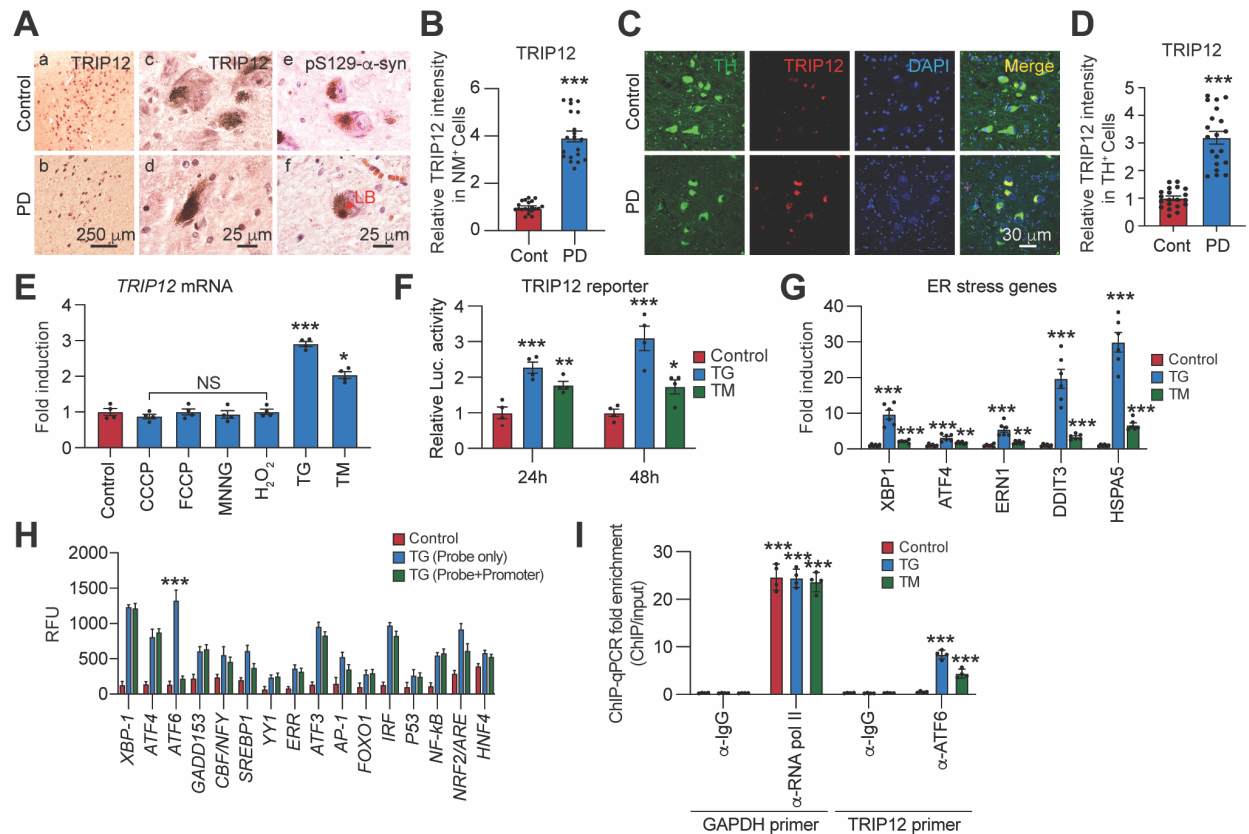

**Figure S4. TRIP12 increases in the dopaminergic neurons in the SN of human PD postmortem brain and ER stress induces TRIP12 expression via transcription factor ATF6 (Related to Figure 2).**

(A) Representative images showing the TRIP12 accumulation in the neuromelanin-positive (NM<sup>+</sup>) dopaminergic neurons of the SNpc of human PD postmortem brain.

(B) Quantitation of the TRIP12 levels from the pigmented dopaminergic neurons of the SNpc (n=20, each group).

(C) Representative images showing the TRIP12 accumulation in the TH-positive (TH<sup>+</sup>) dopaminergic neurons of the SNpc of human PD postmortem brain.

(D) Quantitation of the TRIP12 levels from the TH<sup>+</sup> dopaminergic neurons of the SNpc (n=20, each group).

(E) *TRIP12* mRNA expression is upregulated in SH-SY5Y cells after 2 hours by ER stress-inducing reagent, thapsigargin (TG; 1 mM) or tunicamycin (TM; 1 mg/ml), but not by Carbonylcyanide-3-chlorophenylhydrazone (CCCP; 10  $\mu$ M) and carbonylcyanide-4 trifluoromethoxyphenylhydrazone (FCCP; 1  $\mu$ M) provoked mitochondrial dysfunction; methylnitro nitrosoguanidine (MNNG; 100  $\mu$ M) induced DNA damage or hydrogen peroxide (100  $\mu$ M) generated oxidative stress.

(F) The luciferase reporter assay shows that ER stress-inducing reagents increase *TRIP12* at the transcriptional level.



(G) The expression of ER stress-related genes (*XBP1*, *ATF4*, *ERN1*, *DDIT3*, and *HSPA5*) are increased in TG or TM treated SH-SY5Y cells.

(H) Transcription factors for TRIP12 expression were screened using an ER-related promoter binding transcription factor profiling assay.

(I) The involvement of transcription factor ATF6 in *TRIP12* gene regulation was confirmed with a ChIP assay. Data are represented as the mean  $\pm$  SEM (NS; not significant, \* $P < 0.05$ , \*\* $P < 0.01$ , \*\*\* $P < 0.001$ ).

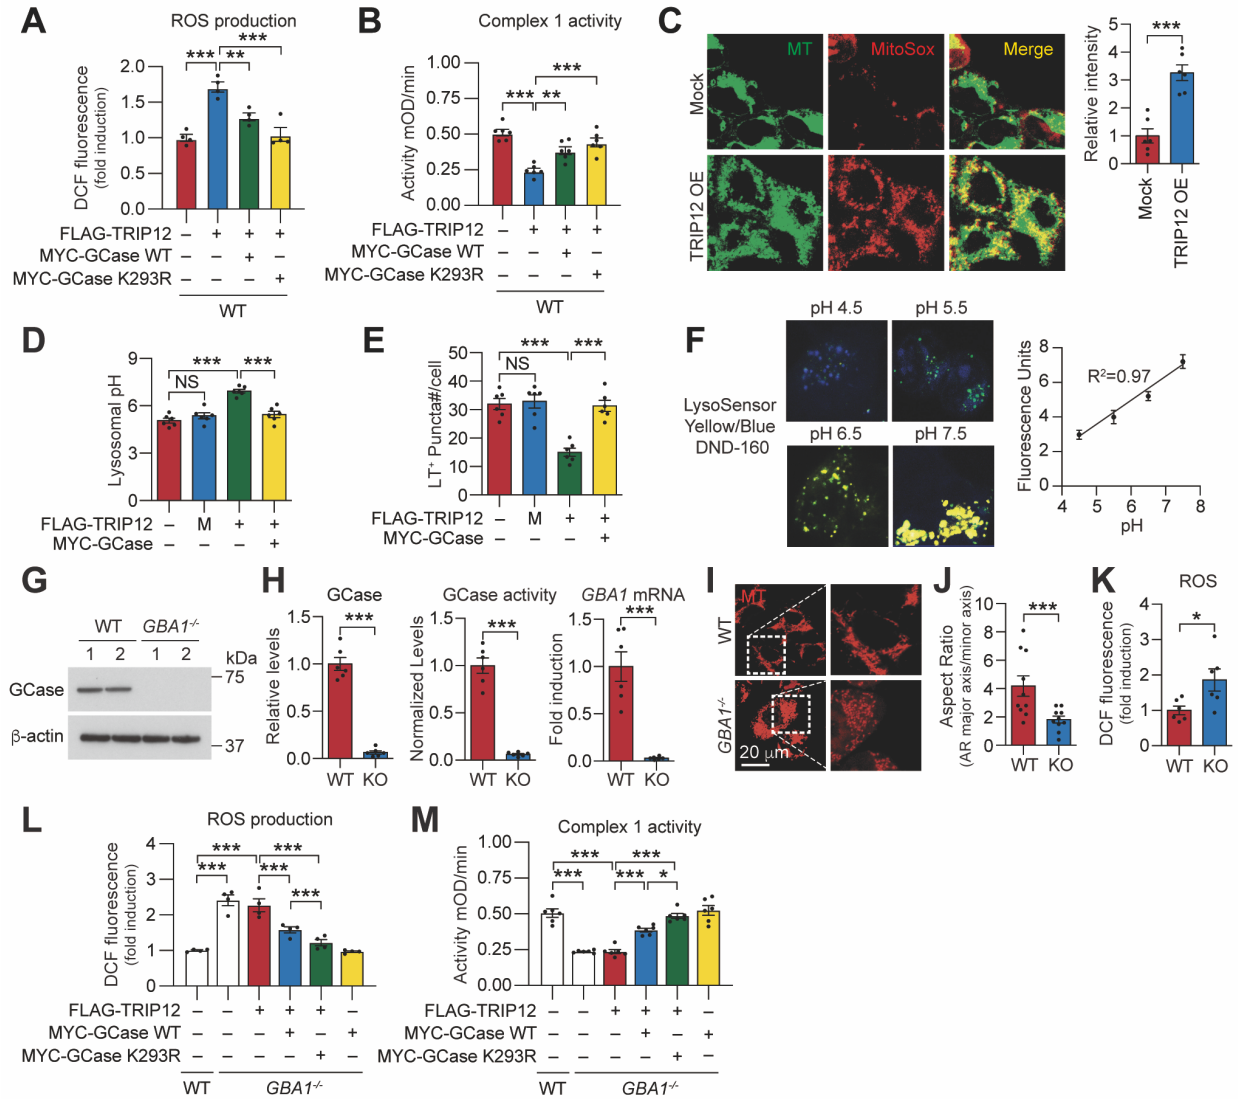

**Figure S5. TRIP12 accumulation causes mitochondria dysfunction via GCase-dependent manner (Related to Figure 3).**

(A and B) WT SH-SY5Y cells were transfected with only FLAG-TRIP12, both FLAG-TRIP12 and MYC-GCase WT, or both FLAG-TRIP12 and MYC-GCase K293R.

(A) Bar graph of ROS production (n=4, each group)

(B) Bar graph of Mitochondrial complex I activity (n=4, each group).

(C) Mitochondria-derived ROS was assessed by MitoSox staining and represented in bar graph.

(D) The lysosomal pH was measured using LysoSensor and represented in bar graph. (E) The number of LysoTracker-positive puncta per cell was measured and represented in bar graph.

(F) A standard graph to evaluate lysosomal pH.

(G) GCase expression levels were assessed in *GBA1* knockout SH-SY5Y cells by western blot analysis.

(H) GCase levels, GCase activity, and *GBA1* mRNA expression levels were represented as bar graphs (n=6, each group).

- (I) Mitotracker (MT; Red) were used to stain mitochondria, respectively, in WT or *GBA1* knockout SH-SY5Y cells. Mitochondrial fragmentation was detected in *GBA1* knockout SH-SY5Y cells.
- (J) Mitochondrial aspect ratio was calculated in WT or *GBA1* knockout SH-SY5Y cells (n=10, each group).
- (K) ROS production was measured and represented as a bar graph (n=6, each group).
- (L and M) *GBA1* knockout SH-SY5Y cells were transfected with only FLAG-TRIP12, MYC-GCase, both FLAG-TRIP12 and MYC-GCase WT, or both FLAG-TRIP12 and MYC-GCase K293R.
- (L) Bar graph of ROS production (n=4, each group).
- (M) Bar graph of Mitochondrial complex I activity (n=4, each group). Data are represented as mean  $\pm$  SEM (NS; not significant, \*P < 0.05, \*\*P < 0.01, \*\*\*P < 0.001).

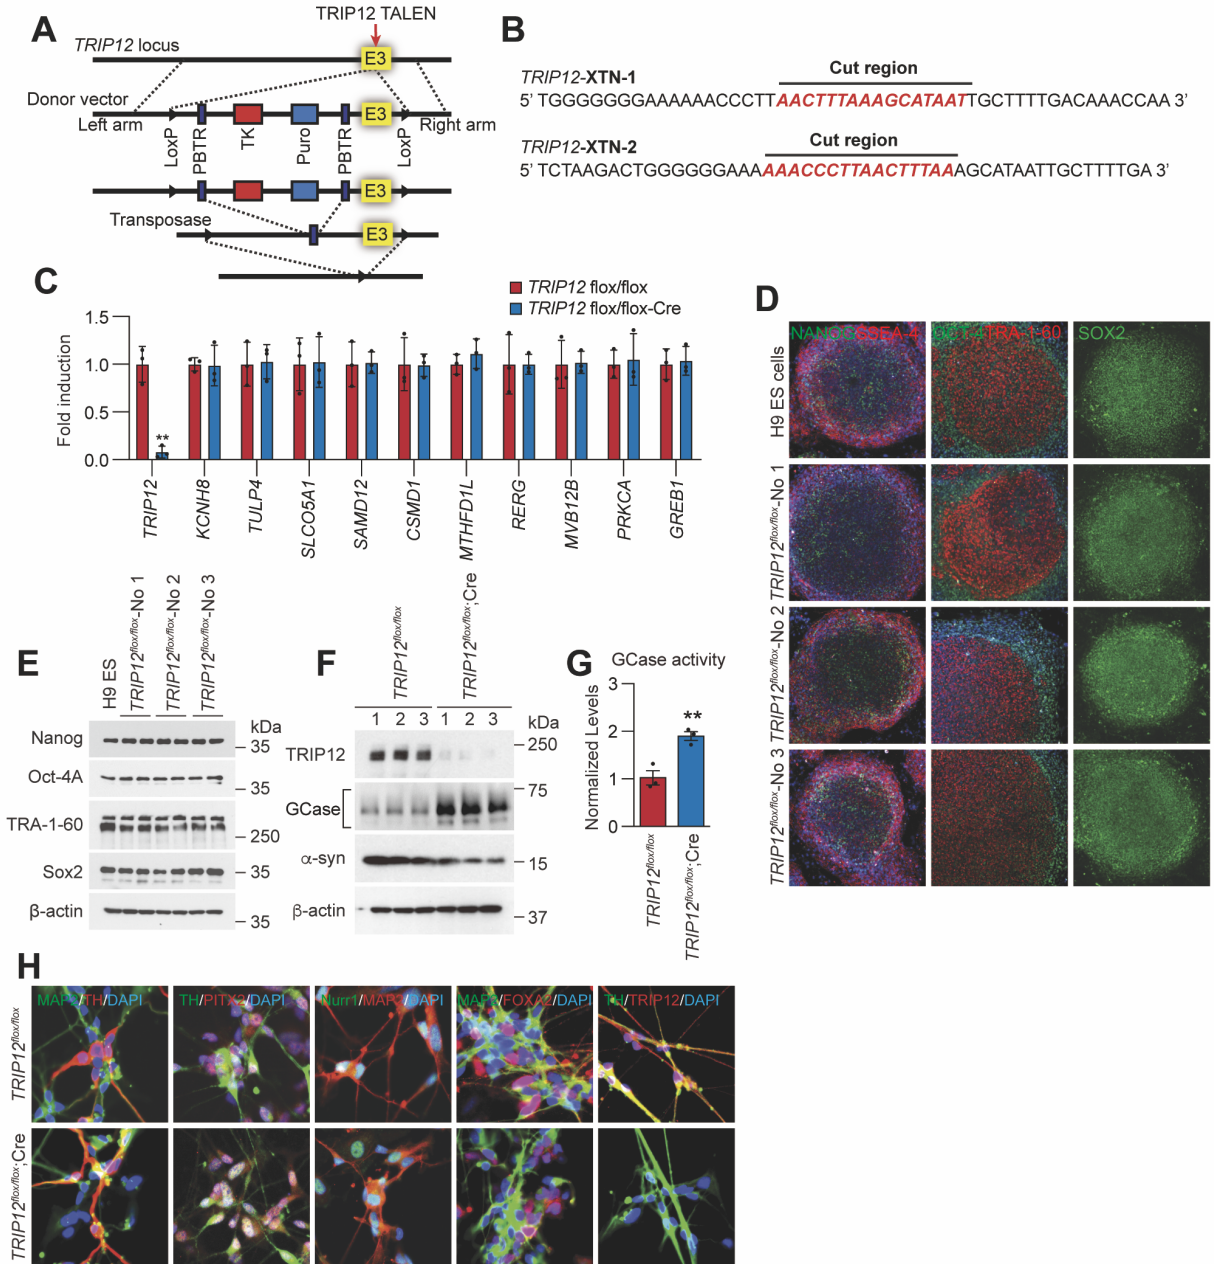

**Figure S6. Generation and characterization of conditional *TRIP12* knockout ES-derived human DA neurons (Related to Figure 5).**

(A and B) Schematic diagram of the transcription activator-like effector nuclease (TALEN)-based *TRIP12* knockout construction and specific target sequences.

(C) The evaluation of off-target effects in *TRIP12* ES knock-out line.

(D) Conditional *TRIP12* knockout (*TRIP12*<sup>flox/flox</sup>;Cre) ES cell lines were characterized by staining for the endogenous pluripotent markers NANOG, SSEA-4, OCT-4, TRA-1-60, and SOX2.

(E) Western blot with anti-NANOG, anti-OCT-4A, anti-TRA-1-60, and anti-Sox2 in *TRIP12* conditional knockout (*TRIP12*<sup>flox/flox</sup>;Cre) ES cell lines.

(F) TRIP12, GCase, and  $\alpha$ -syn expression levels the Human ES cells after 60 days of maturation to DA neurons.

(G) GCase activity.

(H) After maturation, DA neurons were confirmed by the neuronal markers TH, PITX2, Nurr1, and FOXA2. The TRIP12 expression was confirmed in Control (*TRIP12<sup>fllox/fllox</sup>*) and was absent in *TRIP12* knockout (*TRIP12<sup>fllox/fllox</sup>;Cre*) human DA neurons. Data are presented as the mean  $\pm$  SEM (NS; not significant, \* $P < 0.05$ , \*\* $P < 0.01$ , \*\*\* $P < 0.001$ ).

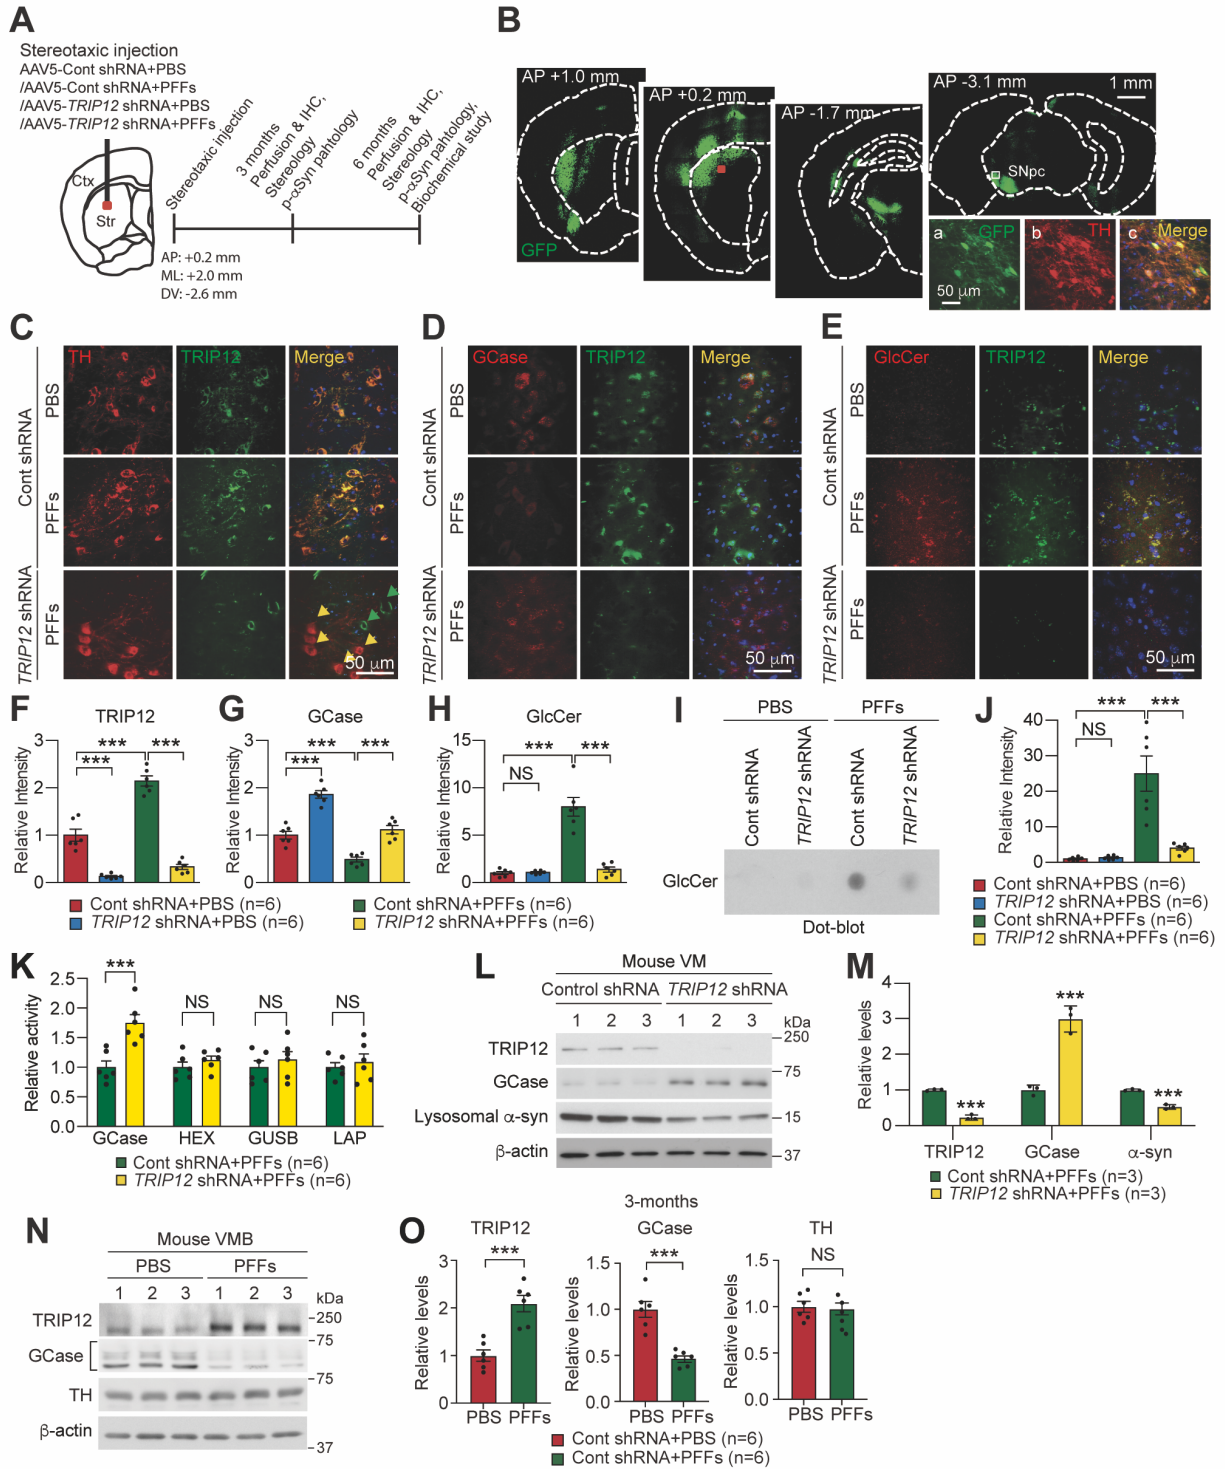

**Figure S7. TRIP12 Knockdown protects against  $\alpha$ -synuclein PFFs-induced neurodegeneration *in vivo* (Related to Figure 7).**

(A) A schematic illustration of stereotaxic intrastriatal injection.

(B) GFP expression in the SNpc at 1-month post-injection of AAV5-Cont shRNA.

(C) Representative confocal images of TRIP12 (green) in TH-positive cells (red) of the SNpc of PBS or  $\alpha$ -syn PFFs injected mice transduced with AAV5-Cont shRNA (Cont shRNA) or AAV5-TRIP12 shRNA (TRIP12 shRNA).

(D) GCCase (red) and TRIP12 (green) were stained in the SNpc of mice.

(E) GlcCer (red) and TRIP12 (green) were stained in the SNpc of mice.

(F-G) Bar graph of fluorescence intensity of TRIP12, GCCase, and GlcCer.

(I and J) GlcCer levels were determined via dot-blot with an anti-GlcCer antibody.

(K) The activities of lysosomal hydrolases such as GCCase, hexosaminidase A/B/C (HEX),  $\beta$ -glucuronidase (GUSB), and lysosomal acid phosphatase (LAP) were measured in the VMB of  $\alpha$ -syn PFFs-injected mice with or without *TRIP12* knockdown and represented in bar graph.

(L and M) The expression of TRIP12, GCCase, and lysosomal  $\alpha$ -syn expression levels measured in the VMB of  $\alpha$ -syn PFFs-injected mice with or without *TRIP12* knockdown by western blot and represented in bar graph.

(N and O) TRIP12, GCCase, and TH levels in the VMB of mice at 3-months after  $\alpha$ -syn PFFs injection without *TRIP12* knockdown.

(N) Representative western blots showing TRIP12, GCCase, TH, and  $\alpha$ -syn levels from the ventral midbrain of  $\alpha$ -syn PFFs-injected mice.

(O) Protein levels were quantified as bar graphs. (n=6, each group). Data are represented as mean  $\pm$  SEM (NS; not significant, \*\*\* $P < 0.001$ ).

## SUPPLEMENTAL TABLE

**Table S1. GCcase binding proteins by Tandem affinity purification analysis (Related to Figure 1).**

| No | SwissProt Acc Nr | Protein Name                                                | M.W. (Da) | Matches Peptide Signals | Unique Peptide (MS/MS) | Unique Peptide ion score | Coverage (%) |
|----|------------------|-------------------------------------------------------------|-----------|-------------------------|------------------------|--------------------------|--------------|
| 1  | GLCM_HUMAN       | Glucosylceramidase                                          | 60,134    | 75                      | 14                     | 1514                     | 28.40        |
| 2  | TRIPC_HUMAN      | Probable E3 ubiquitin-protein ligase TRIP12 (GUMP)          | 222,234   | 39                      | 3                      | 39                       | 1.00         |
| 3  | TBB2C_HUMAN      | Tubulin beta-2C chain                                       | 50,255    | 17                      | 9                      | 248                      | 24.00        |
| 4  | TBA1B_HUMAN      | Tubulin alpha-1B chain                                      | 50,804    | 16                      | 9                      | 297                      | 26.60        |
| 5  | TBA3E_HUMAN      | Tubulin alpha-3E chain                                      | 50,568    | 14                      | 7                      | 232                      | 21.80        |
| 6  | TBB3_HUMAN       | Tubulin beta-3 chain                                        | 50,856    | 13                      | 7                      | 229                      | 19.10        |
| 7  | CALX_HUMAN       | Calnexin                                                    | 67,982    | 12                      | 6                      | 191                      | 13.70        |
| 8  | TBB2A_HUMAN      | Tubulin beta-2A chain                                       | 50,274    | 11                      | 6                      | 179                      | 16.60        |
| 9  | TBB8_HUMAN       | Tubulin beta-8 chain                                        | 50,257    | 10                      | 5                      | 164                      | 13.30        |
| 10 | HSP72_HUMAN      | Heat shock-related 70 kDa protein 2                         | 70,263    | 7                       | 3                      | 250                      | 6.70         |
| 11 | POTEE_HUMAN      | POTE ankyrin domain family member E                         | 122,882   | 6                       | 3                      | 100                      | 3.50         |
| 12 | EF1A2_HUMAN      | Elongation factor 1-alpha 2                                 | 50,780    | 6                       | 3                      | 69                       | 10.80        |
| 13 | IAH1_HUMAN       | Isoamyl acetate-hydrolyzing esterase 1 homolog              | 28,037    | 6                       | 1                      | 38                       | 5.60         |
| 14 | KI67_HUMAN       | Antigen KI-67                                               | 360,698   | 6                       | 6                      | 25                       | 2.90         |
| 15 | SVIL_HUMAN       | Supervillin                                                 | 249,417   | 6                       | 6                      | 17                       | 3.50         |
| 16 | GFAP_HUMAN       | Glial fibrillary acidic protein                             | 49,907    | 5                       | 3                      | 113                      | 7.20         |
| 17 | RAE1_HUMAN       | Rab proteins geranylgeranyltransferase component A 1        | 74,740    | 5                       | 2                      | 34                       | 3.40         |
| 18 | FHAD1_HUMAN      | Forkhead-associated domain-containing protein 1             | 162,659   | 4                       | 2                      | 47                       | 1.80         |
| 19 | WDR52_HUMAN      | WD repeat-containing protein 52                             | 112,571   | 4                       | 1                      | 26                       | 1.90         |
| 20 | OPA1_HUMAN       | Dynamin-like 120 kDa protein, mitochondrial                 | 112,131   | 4                       | 3                      | 23                       | 3.20         |
| 21 | GPBP1_HUMAN      | Vasculin                                                    | 53,478    | 4                       | 1                      | 17                       | 1.90         |
| 22 | HSP76_HUMAN      | Heat shock 70 kDa protein 6                                 | 71,440    | 3                       | 3                      | 126                      | 6.70         |
| 23 | UDB15_HUMAN      | UDP-glucuronosyltransferase 2B15                            | 61,510    | 3                       | 1                      | 51                       | 2.50         |
| 24 | EEA1_HUMAN       | Early endosome antigen 1                                    | 163,337   | 3                       | 2                      | 48                       | 1.90         |
| 25 | CQ104_HUMAN      | Uncharacterized protein C17orf104                           | 108,689   | 3                       | 2                      | 44                       | 2.60         |
| 26 | TRAP1_HUMAN      | Heat shock protein 75 kDa, mitochondrial                    | 80,345    | 3                       | 3                      | 40                       | 8.10         |
| 27 | H2A1A_HUMAN      | Histone H2A type 1-A                                        | 14,225    | 3                       | 1                      | 37                       | 6.90         |
| 28 | 3BHS1_HUMAN      | 3 beta-hydroxysteroid dehydrogenase/Delta 5->4-isomerase ty | 42,510    | 3                       | 1                      | 17                       | 2.40         |
| 29 | FMR1N_HUMAN      | Fragile X mental retardation 1 neighbor protein             | 29,792    | 3                       | 1                      | 17                       | 3.50         |
| 30 | NTRK1_HUMAN      | High affinity nerve growth factor receptor                  | 88,639    | 3                       | 3                      | 17                       | 2.60         |
| 31 | IRX5_HUMAN       | Iroquois-class homeodomain protein IRX-5                    | 50,672    | 3                       | 1                      | 17                       | 1.70         |
| 32 | SPIN1_HUMAN      | Spindlin-1                                                  | 29,696    | 3                       | 3                      | 17                       | 19.80        |
| 33 | CE290_HUMAN      | Centrosomal protein of 290 kDa                              | 290,892   | 3                       | 3                      | 14                       | 1.70         |
| 34 | MYLK2_HUMAN      | Myosin light chain kinase 2, skeletal/cardiac muscle        | 65,214    | 2                       | 2                      | 67                       | 1.80         |
| 35 | SETB1_HUMAN      | Histone-lysine N-methyltransferase SETDB1                   | 145,119   | 2                       | 1                      | 56                       | 0.60         |
| 36 | HNRPD_HUMAN      | Heterogeneous nuclear ribonucleoprotein D0                  | 38,581    | 2                       | 2                      | 55                       | 9.30         |
| 37 | HS90A_HUMAN      | Heat shock protein HSP 90-alpha                             | 85,006    | 2                       | 2                      | 40                       | 3.60         |
| 38 | RHDF1_HUMAN      | Inactive rhomboid protein 1                                 | 98,935    | 2                       | 1                      | 38                       | 1.20         |
| 39 | MYH13_HUMAN      | Myosin-13                                                   | 224,605   | 2                       | 2                      | 35                       | 1.90         |
| 40 | DJB13_HUMAN      | DnaJ homolog subfamily B member 13                          | 36,267    | 2                       | 1                      | 30                       | 2.80         |
| 41 | ZN273_HUMAN      | Zinc finger protein 273                                     | 66,868    | 2                       | 2                      | 25                       | 2.80         |
| 42 | TBA4B_HUMAN      | Putative tubulin-like protein alpha-4B                      | 27,819    | 2                       | 1                      | 24                       | 5.00         |
| 43 | VP13D_HUMAN      | Vacuolar protein sorting-associated protein 13D             | 495,298   | 2                       | 2                      | 24                       | 0.70         |
| 44 | DGKZ_HUMAN       | Diacylglycerol kinase zeta                                  | 125,704   | 2                       | 2                      | 23                       | 2.10         |
| 45 | S12A7_HUMAN      | Solute carrier family 12 member 7                           | 120,283   | 2                       | 2                      | 19                       | 2.20         |
| 46 | ZN175_HUMAN      | Zinc finger protein 175                                     | 84,009    | 2                       | 2                      | 19                       | 3.70         |
| 47 | DEN4C_HUMAN      | DENN domain-containing protein 4C                           | 188,563   | 2                       | 2                      | 18                       | 2.00         |
| 48 | DAXX_HUMAN       | Death domain-associated protein 6                           | 82,064    | 2                       | 1                      | 17                       | 1.20         |
| 49 | CATC_HUMAN       | Dipeptidyl peptidase 1                                      | 52,619    | 2                       | 2                      | 17                       | 3.20         |
| 50 | MYH8_HUMAN       | Myosin-8                                                    | 223,594   | 2                       | 2                      | 17                       | 0.90         |
| 51 | POTEM_HUMAN      | Putative POTE ankyrin domain family member M                | 58,000    | 2                       | 2                      | 17                       | 7.10         |
| 52 | SNX25_HUMAN      | Sorting nexin-25                                            | 98,625    | 2                       | 2                      | 17                       | 1.80         |
| 53 | VP13C_HUMAN      | Vacuolar protein sorting-associated protein 13C             | 424,462   | 2                       | 2                      | 17                       | 0.20         |
| 54 | K1462_HUMAN      | Uncharacterized protein KIAA1462                            | 149,343   | 2                       | 2                      | 16                       | 1.50         |



**Table S2. Identification of GCase's ubiquitination sites and ubiquitin linkages (Related to Figure 1 and Figure S2).**

| Protein identity                                   | Ubiquitination sites of GBA1 (The number of Ubiquitinated lysine residues) |            |            |             |            | Protein coverage by amino acid count |  |
|----------------------------------------------------|----------------------------------------------------------------------------|------------|------------|-------------|------------|--------------------------------------|--|
| GBA1                                               | MEFSSPSREE                                                                 | CPKPLSRVSI | MAGSLTGLLL | LQAVSWASGA  | RPCIPKSFY  | 375/536 = 69.96 %                    |  |
|                                                    | SSVVCVCNAT                                                                 | YCDSFDPPTF | PALGTFSRYE | STRSGRRMEL  | SMGPIQANHT |                                      |  |
|                                                    | GTGLLLTLQP                                                                 | EQKFQKVKGF | GGAMTDAAL  | NILALSPPAQ  | NLLLKSYFSE |                                      |  |
|                                                    | EGIGYNIIRV                                                                 | PMASCDFSIR | TYTYADTPDD | FQLHNFSLPE  | EDTKLKIPLI |                                      |  |
|                                                    | HRALQLAQRP                                                                 | VSLASPWTS  | PTWLKTNGAV | NGKGSLLKQGP | GDIYHQTWAR |                                      |  |
|                                                    | YFVKFLDAYA                                                                 | EHLQFWAVT  | AENEPSAGLL | SGYPFQCLGF  | TPEHQRFIA  |                                      |  |
|                                                    | RDLGPTLANS                                                                 | THHNVRLLML | DDQRLLPHW  | AKVVLTDPEA  | AKYVHGIAVH |                                      |  |
|                                                    | WYLDFLAPAK                                                                 | ATLGETHRLF | PNTMLFASEA | CVGSKFWEQS  | VRLGSWDRGM |                                      |  |
|                                                    | QYSHSIITNL                                                                 | LYHVVGWTDW | NLALNPEGGP | NWVRNFVDSP  | IIVDITKDTF |                                      |  |
|                                                    | YKQPMFYHLG                                                                 | HFSKFIPEGS | QRVGLVASQK | NLDALVALMH  | PDGSAVVVVL |                                      |  |
|                                                    | NRSSKDVPLT                                                                 | IKDPAVGFL  | TISPGYSIHT | YLWRRQ      |            |                                      |  |
|                                                    | (Total 5 ubiquitination sites)                                             |            |            |             |            |                                      |  |
|                                                    | Signal peptide                                                             |            |            |             |            |                                      |  |
| Ubiquitination site (K155, K157, K198, K293, K408) |                                                                            |            |            |             |            |                                      |  |
| Protein identity                                   | Ubiquitination sites of Ub (The number of Ubiquitinated lysine residues)   |            |            |             |            | Protein coverage by amino acid count |  |
| Ubiquitin                                          | MQIFVKTLTG                                                                 | KTITLEVEPS | DTIENVKAKI | QDKEGIPPDQ  | QRLIFAGKQL | 70/76 = 92.11 %                      |  |
|                                                    | EDGRTLSDYN                                                                 | IQKESTLHLV | LRLRGG     |             |            |                                      |  |
| Ubiquitination site (K11, K48)                     |                                                                            |            |            |             |            |                                      |  |

\* Red type K letters indicate ubiquitinated Lysine residues on GBA1 or ubiquitin.

**Table S3. Human post-mortem tissues used in Figure 2 and Figure S4**

Human Substantia nigra postmortem

| Case# | Age | Sex | Race | PMD | Diagnosis        | Genotype | Immunoblotting | Immunohistochemistry (IHC) |
|-------|-----|-----|------|-----|------------------|----------|----------------|----------------------------|
| 713   | 73  | F   | W    | 9   | Control          | WT       | O              |                            |
| 935   | 79  | M   | W    | 16  | Control          | WT       | O              |                            |
| 2052  | 79  | M   | W    | 16  | Control          | WT       | O              | O                          |
| 2193  | 89  | M   | W    | 8.5 | Control          | WT       | O              | O                          |
| 289   | 68  | F   | W    | 35  | Control          | WT       | O              |                            |
| 507   | 87  | F   | W    | 23  | Control          | WT       | O              | O                          |
| 2071  | 76  | M   | W    | 17  | PD with Dementia | WT       | O              |                            |
| 2091  | 83  | F   | W    | 4   | PD with Dementia | WT       | O              | O                          |
| 2138  | 83  | M   | W    | 5   | PD with Dementia | WT       | O              | O                          |
| 2140  | 84  | F   | W    | 9   | PD with Dementia | WT       | O              | O                          |
| 2165  | 80  | F   | W    | 16  | PD with Dementia | WT       | O              |                            |
| 2544  | 89  | M   | W    | 16  | PD with Dementia | WT       | O              |                            |
